# Supplementary material for: Analyzing a broader spectrum of endocrine active organic contaminants in sewage sludge with high resolution LC-QTOF-MS suspect screening and QSAR toxicity prediction
Source: Royal Society of Chemistry journal article supplement (doi:10.1039/c9em00144a), 2019-01-01
Supplement: c9em00144a1.xlsx [file c9em00144a1.xlsx]

## Sheet: S1-Surrogates&Add'lCpds
SI-1
	Molecular Formula	Exact Mass	Ionization Mode	LOD (ng/mL)	LOQ (ng/mL)	Retention Time (min)	Qualifiers (m/z)	pKa	Matched Internal Standard
Surrogates
2-Phenylphenol	C12H10O	170.074	ESI-	25	100	11.693	141.0710, 115.0553	9.55	Estrone-d2
4-tert-Octylphenol	C14H22O	206.131	ESI-	10	50	14.559	133.0659, 93.0346	10.16	Estrone-d2
Carbamazepine	C15H12N2O	236.095	ESI+	0.25	10	9.671	194.0964, 179.0730	15.96	Methomyl-d3
Estriol	C18H24O3	288.173	ESI-	10	25	8.314	171.0815, 145.0659	10.33	Estriol-c13
Estrone	C18H22O2	270.162	ESI-	1	10	11.49	145.0659, 183.0804	10.33	Estrone-d2
Ethinyl Estradiol	C20H24O2	296.178	ESI-	0.5	10	11.298	169.0658, 145.0659	10.33	Estriol-c13
Metoprolol	C15H25NO3	267.183	ESI+	0.25	10	7.243	116.1070, 74.0600	14.09	Methomyl-d3
Miconazole	C18H14Cl4N2O	413.986	ESI+	1	10	11.428	158.9745, 69.0447	6.77	Miconazole Nitrate-d5
Norgestrel	C21H28O2	312.209	ESI+	1	10	12.226	245.1900, 109.0648	17.91	Sulfamethoxazole-d4
Sulfamethoxazole	C10H11N3O3S	253.053	ESI+	0.5	10	8.26	156.0080, 65.0386	6.16	Sulfamethoxazole-d4
Triclocarban	C13H9Cl3N2O	315.578	ESI+	10	25	14.365	161.9867, 127.0178	11.42	Simazine-d10
Trimethoprim	C14H18N4O3	290.138	ESI+	0.25	1	6.445	123.0665, 230.1162	7.12	Trimethoprim-d3
Additional Compounds
Diclofenac	C14H11CL2NO2	295.017	ESI+	1	10	12.665	214.0418, 250.0185	4	Sulfamethoxazole-d4
Efavirenz	C14H9ClF3NO2	315.027	ESI+	10	25	13.151	244.0136, 272.0448	12.52	Sulfamethoxazole-d4
Flunixin	C14H11F3N2O2	296.077	ESI+	0.5	10	11.312	279.074, 264.0505	1.88	Methomyl-d3
Fluoxetine	C17H18F3NO	309.134	ESI+	0.5	50	9.867	148.1119, 158.1178	9.8	Pendimethalin-d5
Fluvoxamine	C15H21F3N2O2	318.156	ESI+	1	25	9.463	200.0682, 71.0503	8.86	Methomyl-d3
Gemfibrozil	C15H22O3	250.157	ESI-	10	25	13.146	121.0659, 106.0424	4.5	Estriol-c13
Lamotrigine	C9H7Cl2N5	255.01	ESI+	0.25	10	7.139	210.9824, 58.0400	14.98	Simazine-d10
Mefenamic Acid	C15H15NO2	241.11	ESI+	1	10	13.532	224.1070, 180.0808	3.89	Simazine-d10
Methyl Dihydrojasmonate	C13H22O3	223.157	ESI+	25	50	12.839	209.1546, 153.1274	-6.9	Sulfamethoxazole-d4
N, N-diethyl-meta-tolumide (DEET)	C12H17NO	191.131	ESI+	1	10	10.665	119.0491, 91.0542	-0.95	Pendimethalin-d5
Triclosan	C12H7Cl3O2	287.951	ESI-	1	10	14.467	159.9728, 126.0116	7.68	Estrone-d2
Table S1: Chemical properties of 12 surrogate compounds used in method development and 11 additional compounds used in method validation. Reporting detection and quantificaiton limits, retention times, ionization mode, and MS/MS fragments are reported here. Isotopically labeled internal standards were paired based on similar matrix factors analyzed in matrix spiked samples.

## Sheet: S2-Surrogate Properties
S2-1: Physicochemical property ranges of 50 reported compounds in sewage sludge that are suspected, known, or analogous to known endocrine disrupting compounds. Minima, first quartile (Q1), second quartile (median), third quartile (Q3) and maxima of the physiochemical properties of these compounds are shown. MW= molecular weight. Kow= log10 octanol-water partitioning coefficient. Abraham paramete…
S2-2: Physicochemical property ranges of 12 surrogate compounds used for method validation that are representative of the minima, first quartile (Q1), second quartile (median), third quartile (Q3) and maxima of the physiochemical properties of compounds found in sewage sludge as outlined in Figure 1. MW= molecular weight. Kow= log10 octanol-water partitioning coefficient. Abraham parameters: A= h…
S2-3: Surrogate compounds and physicochemical properties used for method validation

## Sheet: S3-MethodDevelopment
S3-1: Absolute recoveries using two different starting weights and two different solvent ratio's (ratio of solvent volume-to-starting sample weight). The red (0.25 g starting sample weight, solvent ratio 40) and blue (1.0 g starting sample weight, solvent ratio 80) bars depict absolute recoveries for each compound. The light blue and light red area represent matrix factors for each compound. MF =…
S3-2: Absolute recoveries investigating two extraction solvents (water:acetonitrile (1:1) and methanol:acetonitrile (1:1)) under "sequential" pH combination conditions and "combined" pH conditions. Sequential pH combination conditions first performed an extraction under acidic conditions and subsequently followed by an extraction under neutral conditions. Combined pH conditions performed an acidi…
S3-3 Summary of methods investigated to combine extracts of varying pH. (A) "Separate": separate extracts were injected for separate pH experiments, (B) "Combined": two fractions were extracted under different pH conditions simultaneously and supernatants were combined prior to SPE and a single injection was analyzed, and (C) "Sequential": a sample was first extracted under acidic conditions, the…
S3-4: Recoveries of surrogates using different pH adjusted extraction workflows. Separate extractions were performed under acidic (blue bars), neutral (red bars), and basic (yellow bars) conditions. Recoveries of the three separate extraciton conditions are compared to absolute recoveries of the combined (purple bars) and sequential (green bars) extraction methods here. (n=4)
S3-5: Absolute recoveries of surrogate compounds investigating three Solid Phase Extraction cartridges. Agilent BondElut Plexa (500mg, 6cc), Agilent BondElut ENV (500mg, 6cc), and Waters Oasis HLB (500mg, 6cc) cartridges were examined. Matrix Factors are represented by the shaded area plot on the secondary axis. MF = 1 equates to no signal suppression or enhancement, MF<1 is equivalent to a matri…

## Sheet: S4-Sludge Properties
Sample	Sampling Location	% Solids	Starting Sample Weight (g)
S1	After centrifugation	0.232679	1.07
S2*	After 5 years in anaerobic pond	0.0471575	5.3
S3*	Going into anaerobic pond	0.0115234	21.69
S4	After dewatering belt	0.164432	1.52
S5	Anaerobic digester	0.0115423	21.66
S6	After belt pressing	0.262357	0.95
S7	After time on solar drying bed	0.955229	0.26
S8	After screw press (polymer added after anaerobic digestion)	0.155531	1.61
S9º	After screw pressing	0.229752	1.09
S10	After belt pressing	0.142615	1.75
S11	After centrifugation	0.251556	0.99
S12	After anaerobic digestion, dried in ponds	0.714443	0.35
S13º	After thermophilc digestion of sample S9, and additional screw pressing	0.268739	0.93
S14	After centrifugation	0.299325	0.84
*samples came from the same plant
ºsamples came from the same plant
Table S4- Dry weights and sampling locations of 14 California sewage sludge samples. Dry weights were calculated after drying 100g of each sample in an oven at 100 C for 24 hours.

## Sheet: S5-LC-QTOF Settings
LC-QTOF Settings
Injection Volume		5uL
LC Settings
Mobile Phase	A (pos)	milliQ water + 0.1% formic acid
	B (pos)	acetonitrile + 0.1% formic acid
	A (neg)	milliQ water + 1mM ammonium fluoride
	B (neg)	acetonitrile
Solvent Flow		350 μL/min
Gradient		2% B for 1.5 min
		2%-100% B for 15 min
		100% B for 5 min
		equilibration to initial conditions for 3 min
Column		Zorbax Eclipse Plus (100 mm length, 2.5 mm ID, 1.8 µm particle size)
Guard-Column		Zorbax Eclipse Plus (2.5 mm ID, 1.8 µm particle size)
Column Temperature		30°C
Source Parameters
Gas Temperature (C)	300
Gas Flow Rate (L/min)	12
Nebulizer (psi)	25
Sheath gas temperature (C)	350
Sheath gas flow rate (L/min)	11
Capilalry (V)	3000
Nozzle voltage (V)	1500
Fragmentor (V)	110
Skimmer (V)	65
Cell RF (eV)	0, 10, 40
Octopole RF (V)	750
MS Settings
Gas Temperature		300 °C
Dyring Gas Flow		12 l/min
Nebulizer		25 psig
Sheath Gas Temperature		350 °C
Sheath Gas Flow		11 l/min
Vcap		3500 (pos), 3000 (neg)
Fragmentor		110 V
scan range		50-1050 m/z
scan speed		4 spectra/s
All-Ions Acquisition		Collision Energy (eV): 0, 10, 40
Reference Mass Correction	pos	121.0509, 922.0098
	neg	112.9855, 1033.9881
S5: LC-QTOF-MS settings used for All Ions acqusition

## Sheet: S6-Suspect Screening Settings
Suspect Screening Settings
Software	Agilent MassHunter Qualitative Analysis (B.07.00)
Workflow	Find Compounds by Formula
Values to Match	Mass
Libraries	i) Agilent Forensic Tox PCDL. 8998 compounds
	ii) Agilent Water Contaminants PCDL. 1451 compounds
	iii) Agilent Pesticide PCDL. 1684 compounds.
Extraction Algorithm	Agile 2
Match Tolerance Masses	± 10ppm
Allowed Adducts	pos: [M+H]+, [M+Na]+,[M+NH4]+
	neg [M-H]-
Allowed Charge State	1
Isotope Model	common organic molecules
Peak spacing tolerance	0.0025 m/z, plus 7 ppm
Scoring (Weight)	Mass Score: 100
	Isotope Abundance Score: 60
	Isotope Spacing Score: 50
Find by Formula Score	>70 (out of 100)
Absolute Height	> 1000 counts
Confirm with fragment ions	if MS/MS spectra available
number of most specific ions from MS/MS library	5
RT difference	± 0.2 min
S/N ratio	not applied
Coelution score	> 85%
Minimum Number of Qualified Fragments	1
S6: Find by Formula parameters used for Suspect Screening of 14 California sewage sludge samples
